# Supplementary material
Source: publisher figshare collection journal article supplement (https://acs.figshare.com/ndownloader/files/5820351)
Supplement: Supplementary file 1 [file 5820351]

HETATM    1 ZR   NONE    1       5.043   4.970    .575   .00   .00
HETATM    2  C2  NONE    1       5.778   5.053   2.747   .00   .00
HETATM    3  C3  NONE    1       4.799   4.491   3.804   .00   .00
HETATM    4  O4  NONE    1       6.431   5.471   -.670   .00   .00
HETATM    5  O5  NONE    1       3.490   5.853   -.391   .00   .00
HETATM    6  O6  NONE    1       5.011   7.552   1.410   .00   .00
HETATM    7  O7  NONE    1       5.064   2.961    .727   .00   .00
HETATM    8 8H   NONE    1       3.857   5.056   3.845   .00   .00
HETATM    9 9H   NONE    1       5.219   4.516   4.820   .00   .00
HETATM   10 0H1  NONE    1       6.645   4.376   2.664   .00   .00
HETATM   11 1H1  NONE    1       6.199   6.012   3.081   .00   .00
HETATM   12 2H1  NONE    1       4.541   3.447   3.591   .00   .00
HETATM   13 3H1  NONE    1       4.428   8.619   -.747   .00   .00
HETATM   14 4H1  NONE    1       2.717   8.705   1.055   .00   .00
HETATM   15 5H1  NONE    1       9.950    .454   1.687   .00   .00
HETATM   16 6H1  NONE    1       1.029   5.345   1.975   .00   .00
HETATM   17 7H1  NONE    1       5.222   7.601   2.356   .00   .00
HETATM   18  O18 NONE    1       9.105   1.559  -1.117   .00   .00
HETATM   19  O19 NONE    1       7.055   2.268  -2.690   .00   .00
HETATM   20  O20 NONE    1       8.068   4.785  -2.694   .00   .00
HETATM   21  O21 NONE    1       6.619    .977   -.435   .00   .00
HETATM   22  O22 NONE    1       8.907   6.054   -.536   .00   .00
HETATM   23  O23 NONE    1       7.295   7.295  -2.464   .00   .00
HETATM   24  O24 NONE    1       7.889   9.841  -2.559   .00   .00
HETATM   25  O25 NONE    1       1.134   5.417  -1.407   .00   .00
HETATM   26  O26 NONE    1       4.120   1.400  -1.151   .00   .00
HETATM   27  O27 NONE    1       2.164   2.642  -2.494   .00   .00
HETATM   28  O28 NONE    1       3.204   5.110  -3.004   .00   .00
HETATM   29  O29 NONE    1       1.535   1.234   -.455   .00   .00
HETATM   30  O30 NONE    1       2.398   7.540  -2.332   .00   .00
HETATM   31  O31 NONE    1       2.650  10.106  -2.738   .00   .00
HETATM   32  O32 NONE    1      10.175   3.591    .160   .00   .00
HETATM   33  O33 NONE    1        .681   5.928   1.289   .00   .00
HETATM   34  O34 NONE    1       9.832   1.398   1.519   .00   .00
HETATM   35  O35 NONE    1       4.676  10.319   1.166   .00   .00
HETATM   36 SI   NONE    1       5.143   1.443    .126   .00   .00
HETATM   37 SI   NONE    1       7.656   1.117  -1.693   .00   .00
HETATM   38 SI   NONE    1       4.142   8.806    .683   .00   .00
HETATM   39 SI   NONE    1       7.672   5.943  -1.611   .00   .00
HETATM   40 SI   NONE    1        .119   1.955    .018   .00   .00
HETATM   41 SI   NONE    1       2.604   1.289  -1.714   .00   .00
HETATM   42 SI   NONE    1        .168   5.215   -.109   .00   .00
HETATM   43 SI   NONE    1       2.609   6.017  -1.756   .00   .00
HETATM   44 SI   NONE    1       7.564   3.527  -3.620   .00   .00
HETATM   45 SI   NONE    1       7.566   8.547  -3.526   .00   .00
HETATM   46 SI   NONE    1       2.596   3.715  -3.659   .00   .00
HETATM   47 SI   NONE    1       2.537   8.666  -3.540   .00   .00
HETATM   48 8H4  NONE    1       8.726   3.116  -4.412   .00   .00
HETATM   49 9H4  NONE    1       6.400   3.926  -4.412   .00   .00
HETATM   50 0H5  NONE    1       8.726   8.158  -4.412   .00   .00
HETATM   51 1H5  NONE    1       6.400   8.968  -4.412   .00   .00
HETATM   52 2H5  NONE    1       3.684   3.116  -4.412   .00   .00
HETATM   53 3H5  NONE    1       1.358   3.926  -4.412   .00   .00
HETATM   54 4H5  NONE    1       3.684   8.158  -4.412   .00   .00
HETATM   55 5H5  NONE    1       1.358   8.968  -4.412   .00   .00
TER      56      NONE    1 
END
